# Supplementary material
Source: HighWire-hosted journal article supplement (http://dmd.aspetjournals.org/highwire/filestream/66380/field_highwire_adjunct_files/0/Supplemental_Figure_60319.pdf)

## Supplemental Figure

Evaluation of Near IR Fluorescent Labeling of mAbs as a Tool for Tissue Distribution

Kip P. Conner, Brooke M. Rock, Gayle K. Kwon, Joseph P. Balthasar, Lubna Abaquayyas, Larry C. Wienkers and Dan A. Rock

Biochemistry and Biophysics Group in Pharmacokinetics and Drug Metabolism, Amgen Inc.  
Seattle, WA (KPC, BMR, GKK, LCW, DAR)

Department of Pharmaceutical Sciences, University at Buffalo, The State University of New  
York, Buffalo, NY (JPB)

Quantitative Pharmacology Group in Pharmacokinetics and Drug Metabolism, Amgen Inc.  
Thousand Oaks, CA (LA)

Supplemental Figure 1: (A) Pharmacokinetics of unlabeled representative protein and conjugated 800IR representative protein (B) Pharmacokinetics of unlabeled human IgG1 protein and conjugated 800IR human IgG1 protein

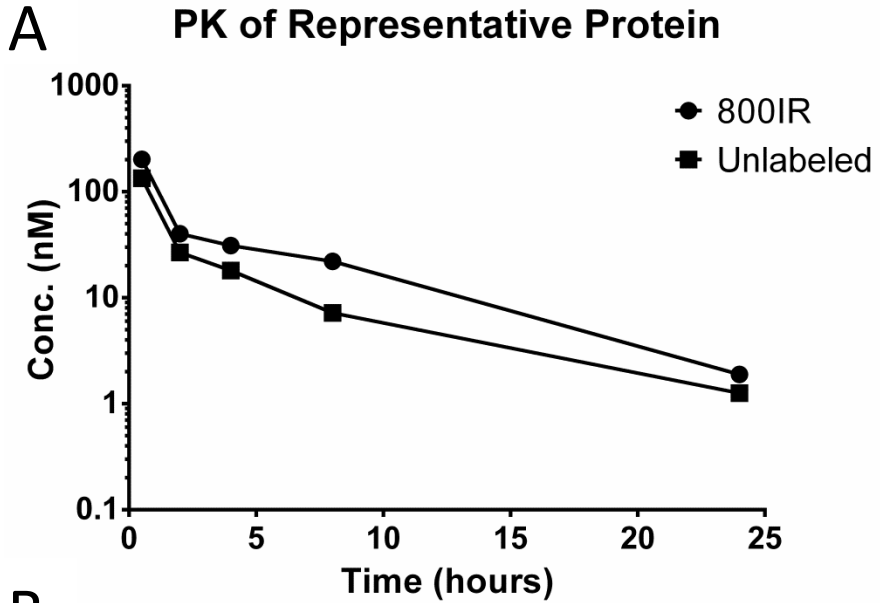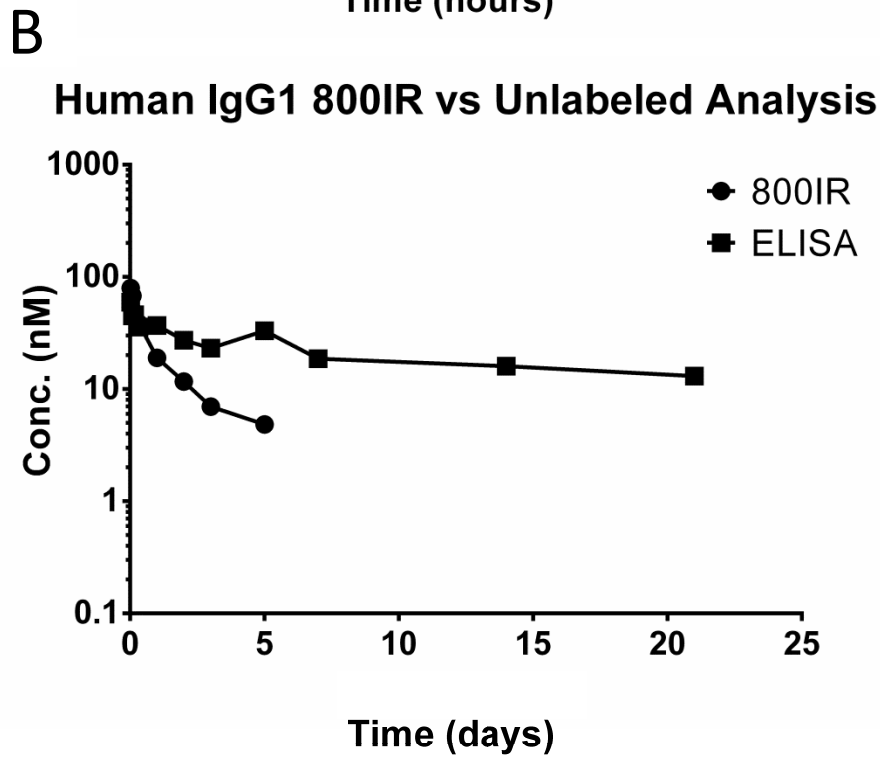

Supplement: Supplemental_Figure_60319.pdf [file Supplemental_Figure_60319.pdf]
